# Supplementary material for: A systematic study on mixtures of Pt/zeolite as hydroisomerization catalysts
Source: Royal Society of Chemistry journal article supplement (doi:10.1039/c6cy02642g), 2017-01-01
Supplement: c6cy02642g1.pdf [file c6cy02642g1.pdf]

## Appendix A: Preparation of zeolites

NH<sub>4</sub>-BEA zeolite was calcined to obtain the protonic form using a protocol published elsewhere (J.P. Marques et al., Chem. Commun. (2004) 2290–2291).

The parent hydrogel for NU-10 was prepared by stirring, firstly, 18 g of colloid silica (40 wt.% SiO<sub>2</sub>) with 80 g of H<sub>2</sub>O during 2 min and adding, secondly, 1.1 g of Al<sub>2</sub>(SO<sub>4</sub>)<sub>3</sub>·18H<sub>2</sub>O, 1.9 g of K<sub>2</sub>O·H<sub>2</sub>O and 4.2 g of 1,6-diaminohexane. The hydrogel was stirred over 4 h at RT and over 2 days at 433 K. At the end of crystallisation period, the suspension was cooled to RT and filtered. The recovered solid was washed and dried at 373 K over 12 h. The sample was calcined under an air flow of 2 L h<sup>-1</sup> g<sup>-1</sup> to remove the organic template. The temperature was increased at a 1 K min<sup>-1</sup> rate and kept at 473 K over 2 h. After, an heating rate of 2 K min<sup>-1</sup> was used to reach 823 K and the plateau was hold over 12 h..

The parent hydrogel for EU-1 was prepared by stirring the Al source solution and Si source suspensions over 20 min. The Al source solution consisted of 0.30 g of NaAlO<sub>2</sub>, 1.1 g of NaOH and 27 g of H<sub>2</sub>O stirred till complete dissolution of the initial salts. The Si source suspension consisted of 15 g of colloid silica (40 wt.% SiO<sub>2</sub>), 29 g of hexamethonium bromide hydrate (58 wt.% H<sub>2</sub>O) and 27 g of H<sub>2</sub>O stirred during 15 min. After the initial mixing period of the hydrogel, stirring proceeded over 4 days at 453 K. At the end of crystallisation period, the suspension was cooled to RT and filtered. The recovered solid was washed and dried at 373 K over 12 h. The sample was calcined under an air flow of 2 L h<sup>-1</sup> g<sup>-1</sup> to remove the organic template. Four plateaux at 423, 523, 623 and 723 K over 1 h each and a final plateau at 823 K over 20h were performed. A heating rate of 5 K min<sup>-1</sup> was used to reach the first plateau. For the following plateaux 1 K min<sup>-1</sup> was used.

The parent hydrogel for ZSM-48 was prepared by stirring the Al source and Si source solutions over 30 min. The Al source solution consisted of 4.2 g of Al(NO<sub>3</sub>)<sub>3</sub>·9H<sub>2</sub>O and 77 g of H<sub>2</sub>O stirred till complete dissolution of Al salt. The Si source suspension was prepared in three steps. Firstly 0.30 g of NaOH were dissolved in 121 g of sodium silicate solution (27 wt.% SiO<sub>2</sub>). After, 176 g of H<sub>2</sub>O and 13 g of H<sub>2</sub>SO<sub>4</sub> (95 wt% purity) were added and the solution was vigorously stirred over 2 h. Finally, 26 g of tetramethylammonium bromide, 233 g of H<sub>2</sub>O and 112 g of *n*-octylamine were added. After the initial mixing period of the hydrogel, stirring proceeded over 6 days at 433 K. At the end of this period, the suspension was cooled to RT and filtered. The recovered solid was washed and dried at 373 K over 64 h.

The sample was calcined under an air flow of  $2 \text{ L h}^{-1} \text{ g}^{-1}$  to remove the organic template. The temperature was increased at a  $1 \text{ K min}^{-1}$  rate and kept at 473 K over 2 h. After, an heating rate of  $2 \text{ K min}^{-1}$  was used to reach 823 K and the plateau was hold over 12 h.

EU-1, NU-10 and ZSM-48 zeolites were exchanged with  $\text{NH}_4^+$  to remove residual  $\text{Na}^+$  and  $\text{K}^+$  ions. The samples were stirred in a solution of  $\text{NH}_4\text{NO}_3$  (10 N), using a V/W (volume of solution (ml)/weight of dried catalyst (g)) ratio of 10. The slurry was heated under agitation at reflux temperature for 4 h and then centrifuged and washed. Samples were dried overnight at 353 K. The procedure was repeated twice in order to guarantee high cation exchange levels. For ZSM-48 (2), a V/P ratio of 20 is used as an initial value of 10 was insufficient to obtain a proper suspension of the powder. In order to obtain the solids in protonic form, the samples were calcined under air flow ( $2 \text{ L h}^{-1} \text{ g}^{-1}$ ) after drying at 383 K over 12 h. Three plateaux at 423, 523 and 623 over 1 h each and a final plateau at 823 K over 4h were performed. A heating rate of  $5 \text{ K min}^{-1}$  was used. Ion exchange efficiencies were superior to 90% issuing metal ion contents lower than 500 ppm.

The structures of zeolites were confirmed by X-Ray Powder Diffraction evidencing as well high levels of crystallinity.

## Appendix B: Fitting of experimental results with the macrokinetic model

### Mixtures of Pt/HUSY(2) and Pt/zeolite catalysts

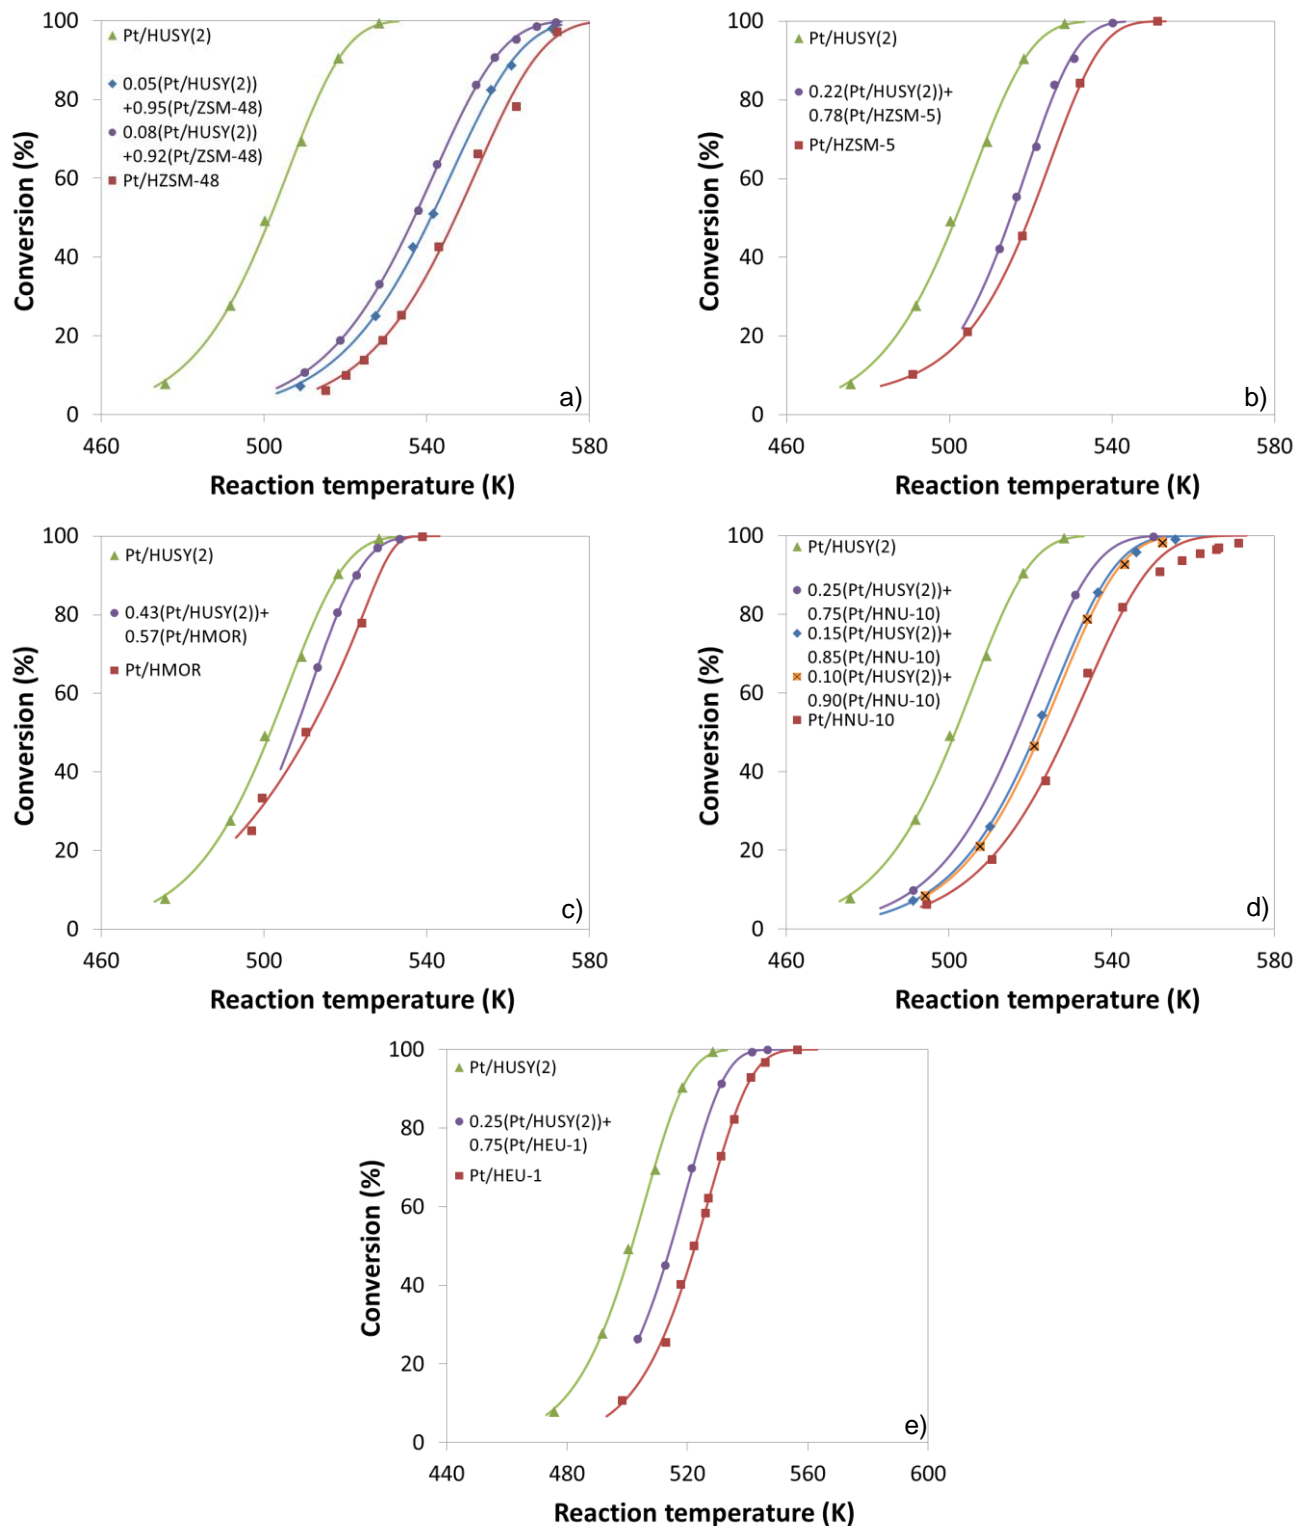

**Figure B.1:**  $n\text{-C}_{16}$  conversion as function of reaction temperature for Pt/HUSY(2) and Pt/zeolite catalysts. Symbols stand for experimental data and lines for model fitting results.

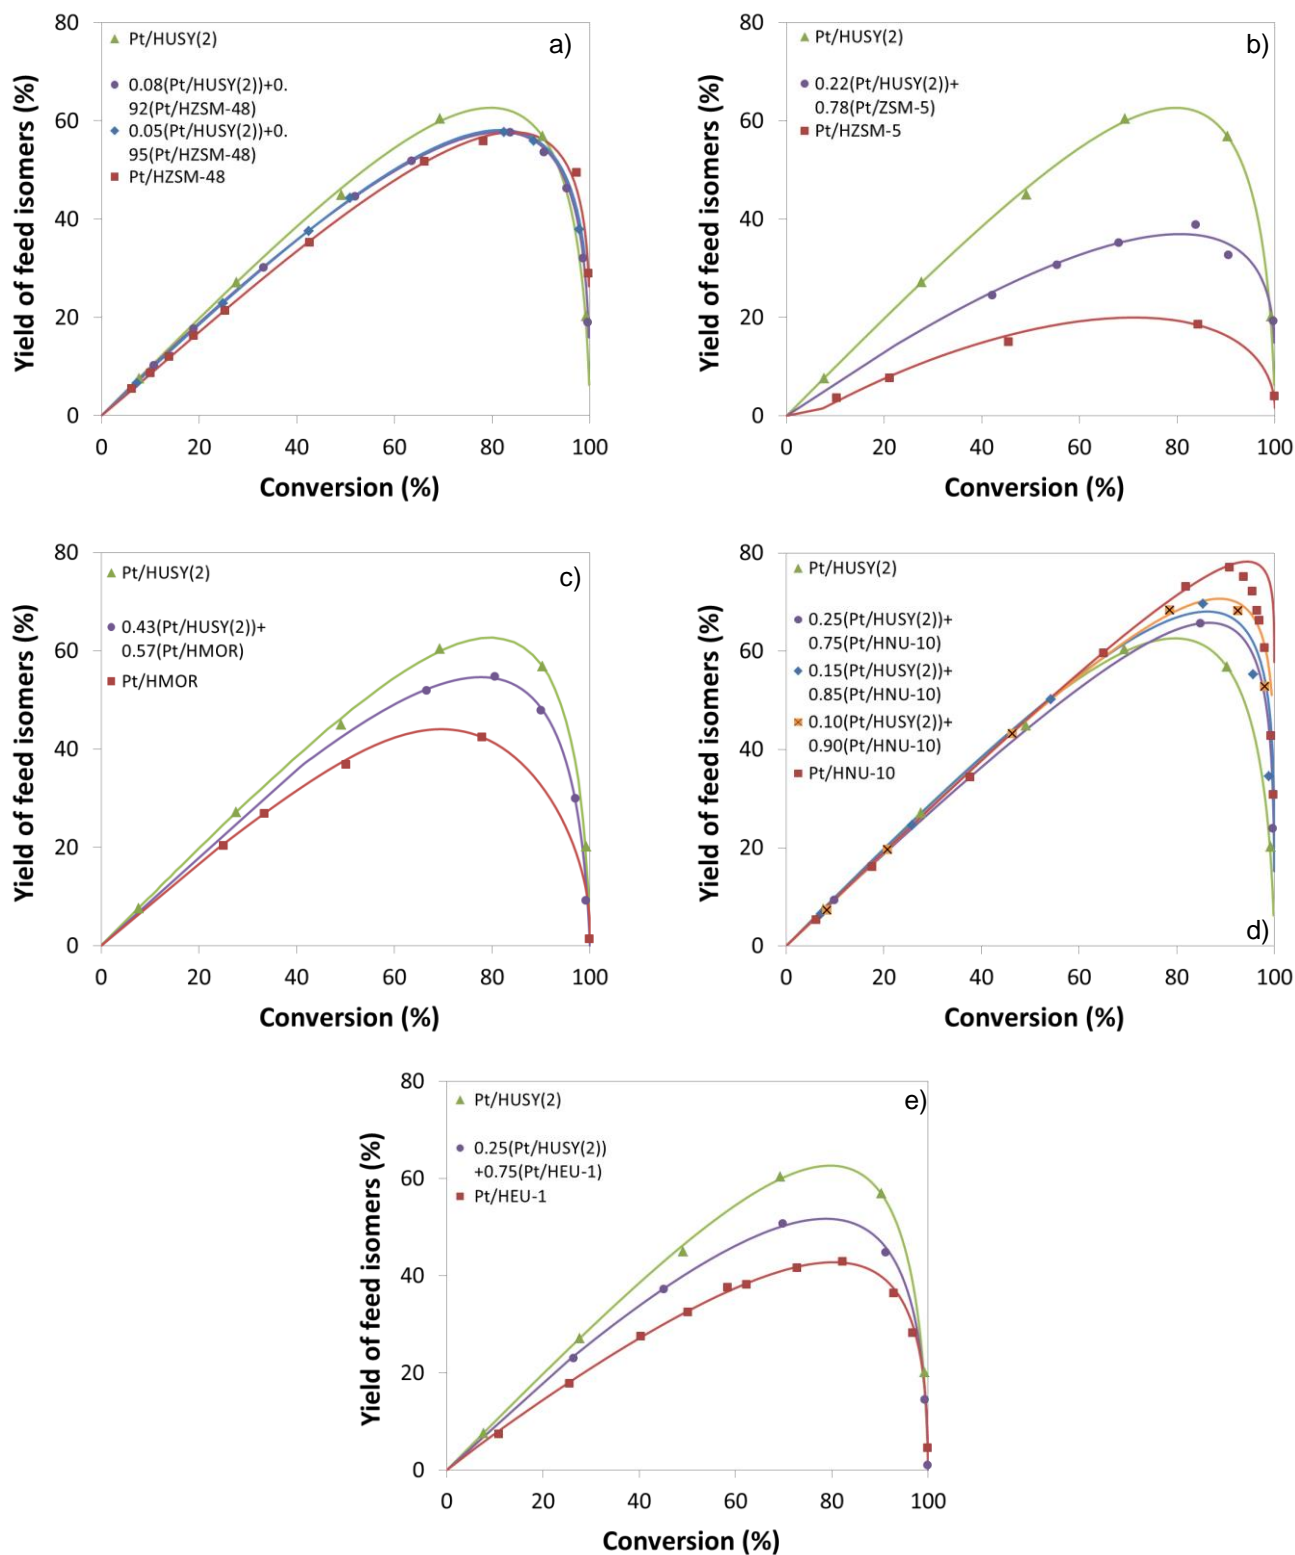

**Figure B.2:** Yield of C<sub>16</sub> isomers as function of conversion for a) Pt/HUSY(1), b) Pt/HBEA and c) Pt/HUSY(1) +Pt/HBEA.

**Table B.1:** Temperature at 50% feed conversion, turnover frequency over protonic sites at 490K and 513K, and maximum isomer yield for individual catalysts and hybrid catalysts based on Pt/HUSY(2) and Pt/zeolite catalysts mixtures

| Sample                   | T @ 50% n-C <sub>16</sub> conversion (K) | TOF <sub>Al</sub> @ 490 K (10 <sup>3</sup> s <sup>-1</sup> ) | TOF <sub>Al</sub> @ 513 K (10 <sup>3</sup> s <sup>-1</sup> ) | Maximal i-C <sub>16</sub> yield (%) |
|--------------------------|------------------------------------------|--------------------------------------------------------------|--------------------------------------------------------------|-------------------------------------|
| Pt/HUSY(1)               | 481                                      | 6.5                                                          | -                                                            | 58.9                                |
| Pt/HUSY(2)               | 502                                      | 2.7                                                          | 14.9                                                         | 62.6                                |
| Pt/HMOR                  | 511                                      | -                                                            | 2.0                                                          | 44.1                                |
| Pt/HZSM-5                | 520                                      | -                                                            | 13.9                                                         | 20.0                                |
| Pt/HEU-1                 | 523                                      | -                                                            | 1.7                                                          | 42.8                                |
| Pt/HNU-10                | 529                                      | -                                                            | 1.8                                                          | 78.3                                |
| Pt/HZSM-48               | 544                                      | -                                                            | 1.0                                                          | 57.7                                |
| 57%Pt/HMOR+Pt/HUSY(2)    | 504                                      | -                                                            | 4.0                                                          | 54.7                                |
| 78%Pt/HZSM-5+Pt/HUSY(2)  | 515                                      | -                                                            | 12.4                                                         | 36.7                                |
| 75%Pt/HEU-1+Pt/HUSY(2)   | 514                                      | -                                                            | 3.5                                                          | 51.7                                |
| 75%Pt/HNU-10+Pt/HUSY(2)  | 517                                      | -                                                            | 4.3                                                          | 65.8                                |
| 85%Pt/HNU-10+Pt/HUSY(2)  | 522                                      | -                                                            | 3.0                                                          | 68.1                                |
| 90%Pt/HNU-10+Pt/HUSY(2)  | 523                                      | -                                                            | 2.7                                                          | 70.7                                |
| 92%Pt/HZSM-48+Pt/HUSY(2) | 537                                      | -                                                            | 2.0                                                          | 57.7                                |
| 95%Pt/HZSM-48+Pt/HUSY(2) | 541                                      | -                                                            | 1.6                                                          | 58.1                                |

### Mixtures of Pt/HUSY(1) and Pt/HBEA catalysts

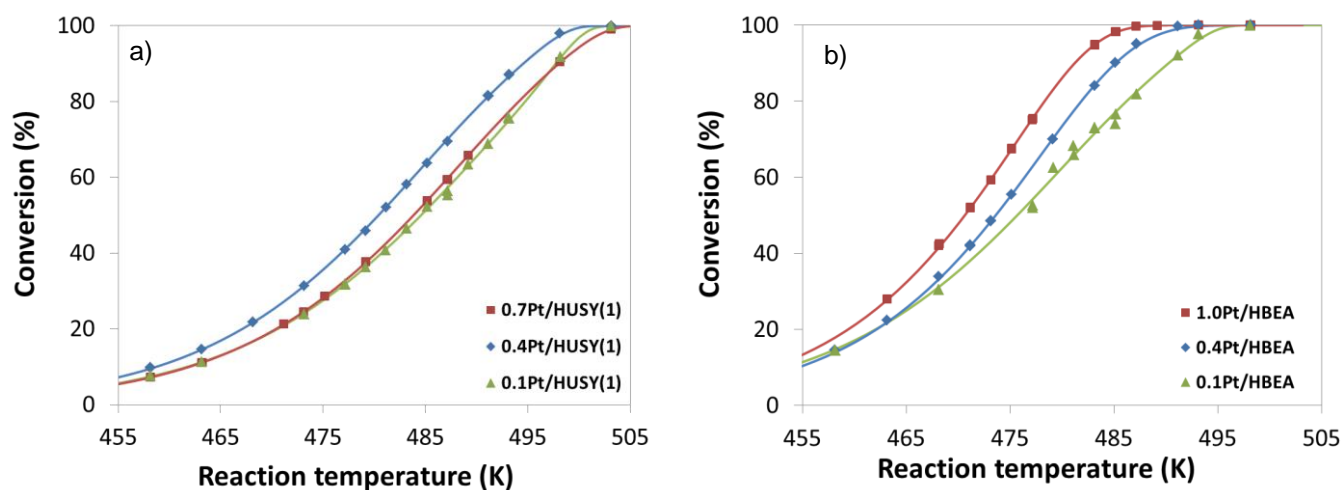

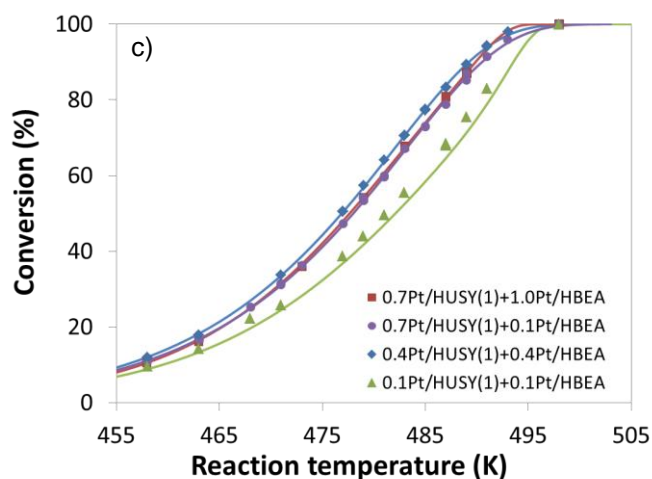

**Figure B.3:**  $n$ -C<sub>16</sub> conversion as function of reaction temperature for Pt/HUSY a) and Pt/HBEA b) catalysts. Symbols stand for experimental data and lines for model fitting results.

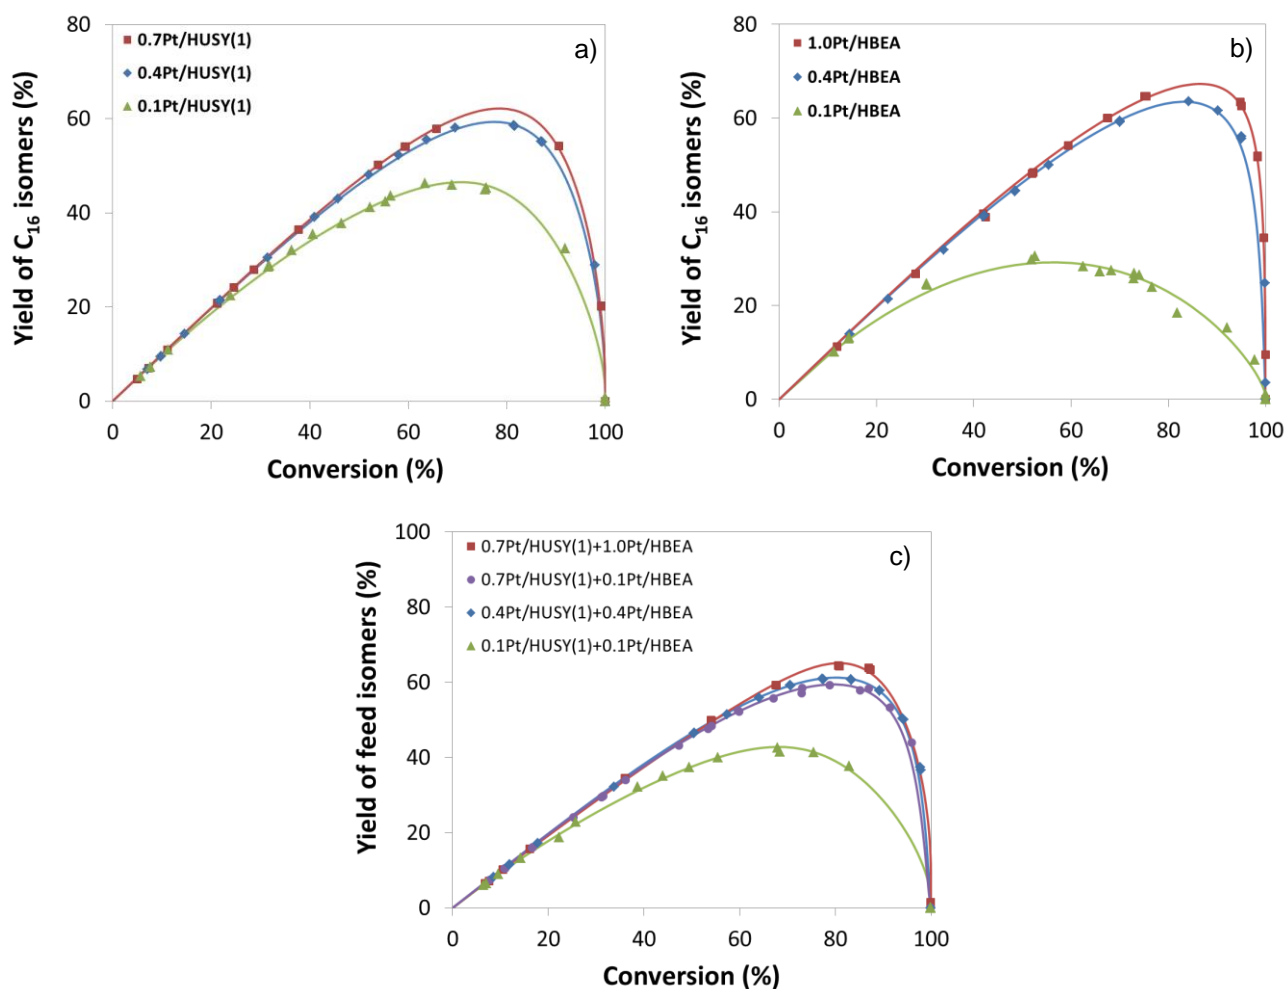

**Figure B.4:** Yield of C<sub>16</sub> isomers as function of conversion for a) Pt/HUSY(1), b) Pt/HBEA and c) Pt/HUSY(1) +Pt/HBEA.

**Table B.2:** Temperature at 50% feed conversion, turnover frequency over protonic sites at 480K and maximum isomer yield for individual catalysts and hybrid catalysts based on 75% Pt/HUSY(1) and 25% Pt/HBEA catalysts mixtures

| Sample                   | T @ 50% n-C <sub>16</sub> conversion (K) | TOF <sub>Al</sub> @ 480 K (10 <sup>3</sup> s <sup>-1</sup> ) | Maximal i-C <sub>16</sub> yield (%) |
|--------------------------|------------------------------------------|--------------------------------------------------------------|-------------------------------------|
| 0.1Pt/HUSY(1)            | 485                                      | 1.6                                                          | 46.5                                |
| 0.4Pt/HUSY(1)            | 481                                      | 2.1                                                          | 59.3                                |
| 0.7Pt/HUSY(1)            | 484                                      | 1.6                                                          | 62.1                                |
| 0.1Pt/HBEA               | 476                                      | 3.0                                                          | 29.2                                |
| 0.4Pt/HBEA               | 474                                      | 4.0                                                          | 63.5                                |
| 1.0Pt/HBEA               | 471                                      | 4.7                                                          | 67.3                                |
| 0.1Pt/HUSY(1)+0.1Pt/HBEA | 481                                      | 2.0                                                          | 42.9                                |
| 0.4Pt/HUSY(1)+0.4Pt/HBEA | 477                                      | 2.9                                                          | 61.3                                |
| 0.7Pt/HUSY(1)+0.1Pt/HBEA | 478                                      | 2.6                                                          | 59.5                                |
| 0.7Pt/HUSY(1)+1.0Pt/HBEA | 478                                      | 2.7                                                          | 65.1                                |

## Appendix C: Parameters for dual-function kinetic model

### Pt/HUSY(2) and Pt/zeolite catalysts

**Table C.1:** Parameters for  $\text{TOF}_{\text{Al}}$  (Equation 5) and  $Y_{i-\text{C}_{16}}$  (Equation 6) determined by fitting catalytic descriptors results to the dual-function kinetic model.

| Zeolites   | $\alpha$<br>( $10^3 \text{ s}^{-1}$ ) | $\gamma$<br>(%) |
|------------|---------------------------------------|-----------------|
| Pt/HUSY(1) | -                                     | 58.9            |
| Pt/HUSY(2) | 14.9                                  | 62.6            |
| Pt/HMOR    | 2.0                                   | 44.1            |
| Pt/HZSM-5  | 13.9                                  | 20.0            |
| Pt/HEU-1   | 1.7                                   | 42.8            |
| Pt/HNU-10  | 1.8                                   | 78.3            |
| Pt/HZSM-48 | 1.0                                   | 57.7            |

### Pt/HUSY(1) and Pt/HBEA catalysts

**Table C.2:** Parameters for  $\text{TOF}_{\text{Al}}$  (Equation 3) and  $Y_{i-\text{C}_{16}}$  (Equation 4) determined by fitting catalytic descriptors results to the dual-function kinetic model.

| Sample     | $\alpha$<br>( $10^3 \text{ s}^{-1}$ ) | $\beta$<br>( $10^3$ ) | $\gamma$<br>(%) | $\epsilon$<br>( $10^3$ ) |
|------------|---------------------------------------|-----------------------|-----------------|--------------------------|
| Pt/HUSY(1) | 2.0                                   | 0.69                  | 65.6            | 1.4                      |
| Pt/HBEA    | 5.2                                   | 2.0                   | 84.0            | 4.5                      |
